# Supplementary material for: Bacterial M10 metallopeptidase as a medicinal target – coordination chemistry of possible metal-based inhibition
Source: Royal Society of Chemistry journal article supplement (doi:10.1039/d2dt02265f), 2022-01-01
Supplement: d2dt02265f1.pdf [file d2dt02265f1.pdf]

**Table S1.** Spectroscopic parameters for Cu<sup>2+</sup> complexes at 298K in aqueous solution. Metal/peptide ratio of 1:1.1. Standard deviation on the last significant figure is given in parentheses. Most abundant complex form at precise pH is bold.

| Species                                               | pH          | UV-Vis            |                                                   | CD                               |                                                         | EPR                    |                 | Proposed donors                     |
|-------------------------------------------------------|-------------|-------------------|---------------------------------------------------|----------------------------------|---------------------------------------------------------|------------------------|-----------------|-------------------------------------|
|                                                       |             | $\lambda$<br>[nm] | $\epsilon$<br>[M <sup>-1</sup> cm <sup>-1</sup> ] | $\Delta$<br>[nm]                 | $\Delta\epsilon$<br>[M <sup>-1</sup> cm <sup>-1</sup> ] | A <sub>  </sub><br>[G] | g <sub>  </sub> |                                     |
| -                                                     | <b>2.07</b> | 800               | 20.50                                             | 212.3<br>236                     | 3.45<br>-27.68                                          | -                      | -               | -                                   |
| <b>[CuH<sub>2</sub>L]</b>                             | <b>3.00</b> | 800               | 24.52                                             | 212.3<br>236                     | 3.05<br>-26.90                                          | 121.3                  | 2.41            | -                                   |
| <b>[CuH<sub>2</sub>L]</b><br>[CuHL]                   | <b>3.99</b> | 800<br>737        | 24.25<br>21.91                                    | 212.3<br>236                     | 2.33<br>-23.74                                          | 120.1                  | 2.42            | -                                   |
| <b>[CuH<sub>2</sub>L]</b><br>[CuHL]<br>[CuL]          | <b>5.01</b> | 716               | 39.98                                             | 236                              | -10.96                                                  | 157.77                 | 2.30            | N <sub>im</sub> , COO <sup>-</sup>  |
| <b>[CuHL]</b><br>[CuL]<br>[CuH <sub>1</sub> L]        | <b>6.08</b> | 647               | 68.09                                             | -                                | -                                                       | 170.90                 | 2.27            | 2N <sub>im</sub> , COO <sup>-</sup> |
| [CuHL]<br><b>[CuL]</b><br>[CuH <sub>1</sub> L]        | <b>7.00</b> | 635.5             | 83.58                                             | 257.1<br>525.7                   | 34.33<br>0.83                                           | 178.10                 | 2.26            | 3N <sub>im</sub> COO <sup>-</sup>   |
| [CuL]<br>[CuH <sub>1</sub> L]<br>[CuH <sub>2</sub> L] | <b>8.02</b> | 619.5             | 93.08                                             | 257.1<br>525.7                   | 40.68<br>2.33                                           | 185.01                 | 2.23            | 3N <sub>im</sub> N <sup>-</sup>     |
| [CuH <sub>1</sub> L]<br><b>[CuH<sub>2</sub>L]</b>     | <b>9.02</b> | 597               | 97.68                                             | 262.8<br>316.8<br>525.7<br>609.9 | 42.46<br>7.075<br>3.20<br>4.97                          | 189.42                 | 2.22            | 3N <sub>im</sub> , N <sup>-</sup>   |

## Bacterial M10 metallopeptidase as a medicinal target - coordination chemistry of possible metal-based inhibition

Paulina Potok,<sup>1</sup> Sławomir Potocki<sup>1\*</sup>

[slawomir.potocki@chem.uni.wroc.pl](mailto:slawomir.potocki@chem.uni.wroc.pl)

<sup>1</sup> Faculty of Chemistry, University of Wrocław, 14 Joliot-Curie St., 50-383 Wrocław, Poland

|                                              |       |       |        |                                  |                                  |        |      |                                    |
|----------------------------------------------|-------|-------|--------|----------------------------------|----------------------------------|--------|------|------------------------------------|
| [CuH <sub>2</sub> L]<br>[CuH <sub>3</sub> L] | 10.07 | 572.5 | 110.18 | 262.8<br>316.8<br>488.3<br>609.9 | 38.63<br>13.83<br>-4.05<br>7.41  | 189.56 | 2.22 | 3N <sub>im</sub> , N <sup>-</sup>  |
| [CuH <sub>2</sub> L]<br>[CuH <sub>3</sub> L] | 11.00 | 538.5 | 127.13 | 262.8<br>316.8<br>488.3<br>609.9 | 32.43<br>17.65<br>-7.88<br>8.88  | 201.99 | 2.19 | 2N <sub>im</sub> , 2N <sup>-</sup> |
| [CuH <sub>3</sub> L]                         | 12.07 | 526.5 | 136.33 | 262.8<br>316.8<br>488.3<br>609.9 | 28.61<br>17.53<br>-10.35<br>9.48 |        |      | N <sub>im</sub> , 3N <sup>-</sup>  |

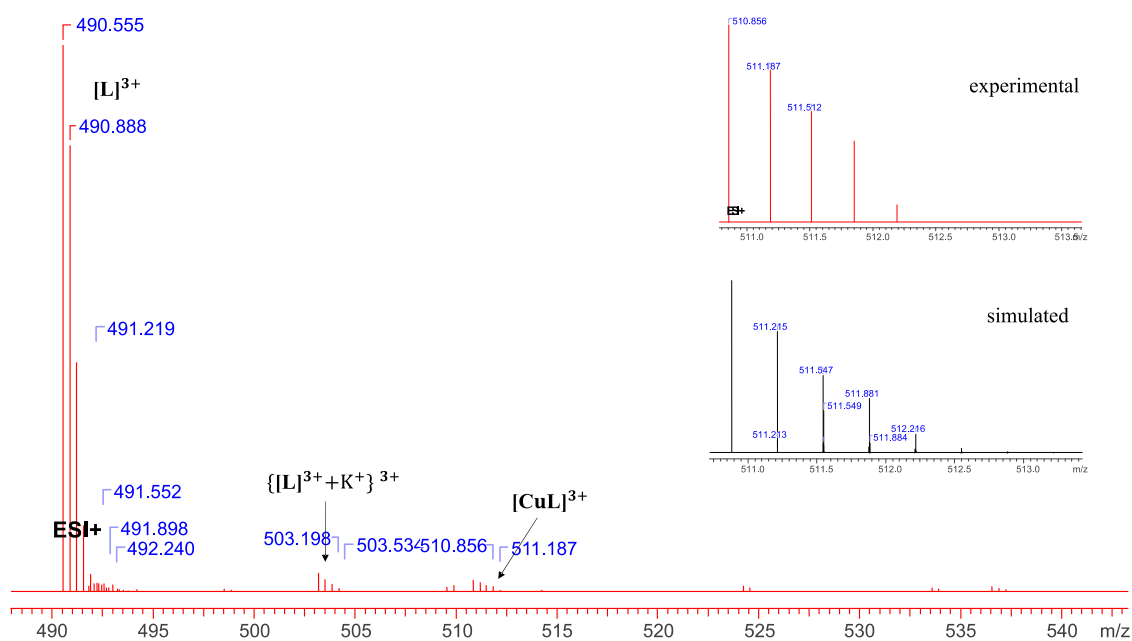

**Figure S1.** Mass spectrum for the Cu(II)-Ac-EHELGHAI GLDHT-NH<sub>2</sub> complex (metal to ligand molar ratio 1:1, [Cu(II)] = 2 mM). Experimental and simulated spectra for the [CuL]<sup>3+</sup> molecular ion with m/z 511.215 are presented in the right corner.

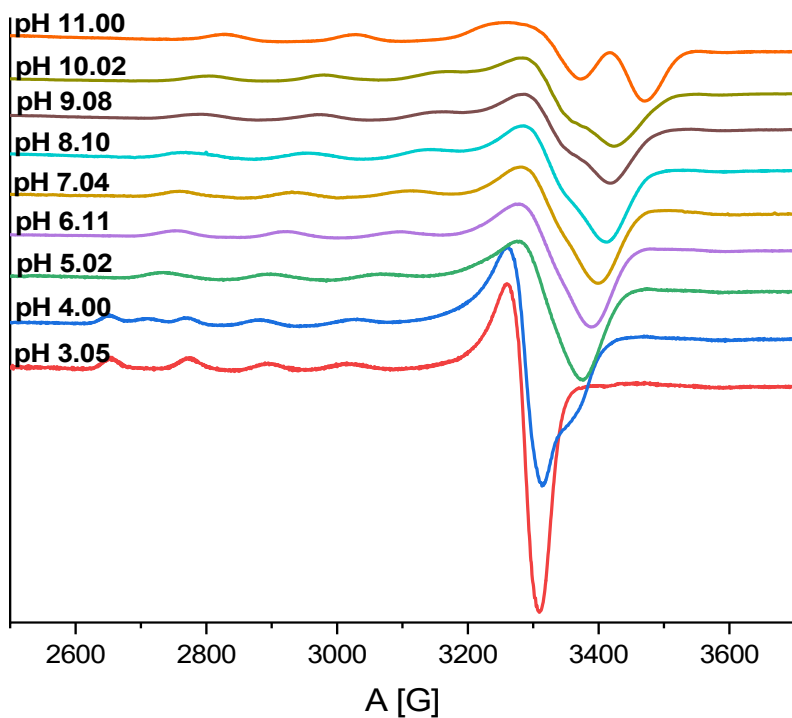

**Figure S2.** EPR spectra performed for the Cu(II)-Ac-EHELGHAI GLDHT-NH<sub>2</sub> complex, 5.00–11.00 pH range.

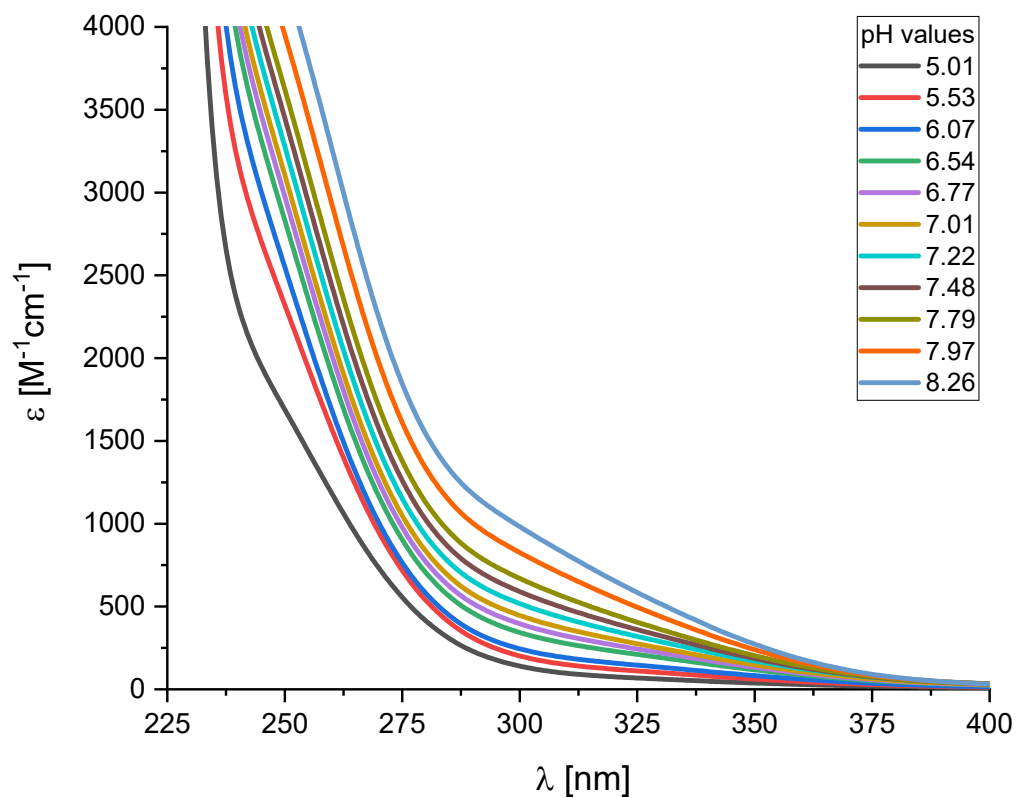

**Figure S3.** UV-Vis region for Cu(II) complexes of the Ac-EHELGHAI GLDHT-NH<sub>2</sub> peptide. Cu(II)/peptide ratio = 1:1.1

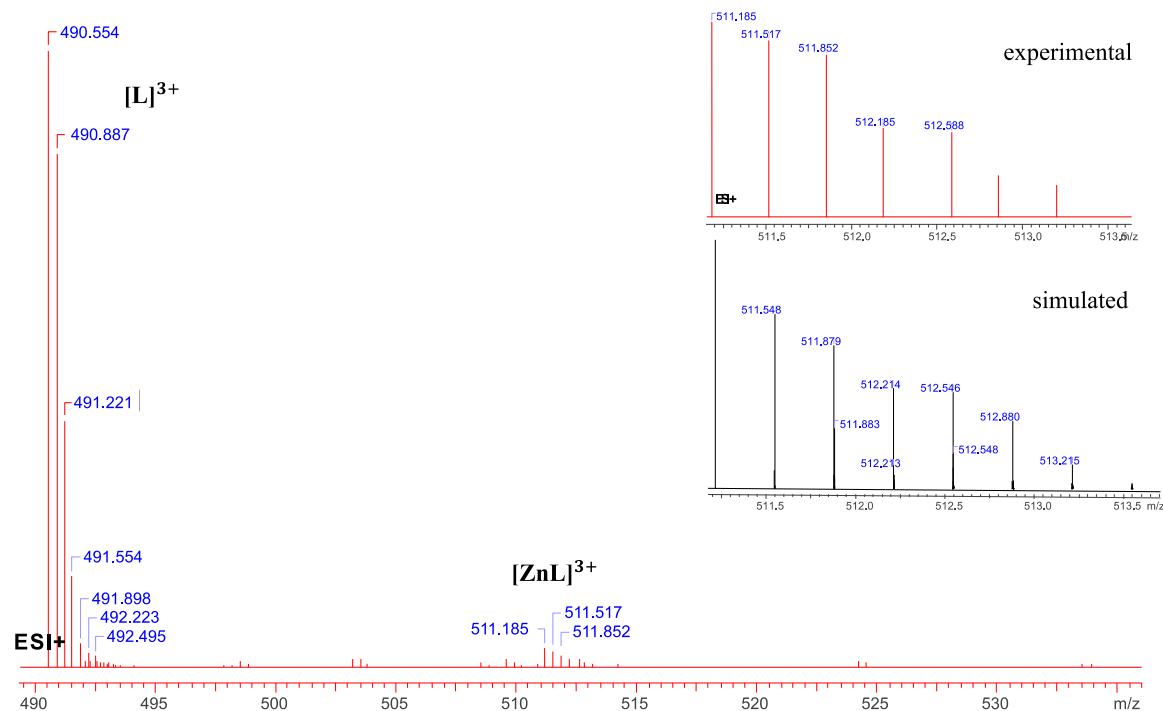

**Figure S4.** Mass spectrum for the Zn(II)-Ac-EHELGHAI GLDHT-NH<sub>2</sub> complex (metal to ligand molar ratio 1:1, [Zn(II)] = 2 mM). Experimental and simulated spectra for the [ZnL]<sup>3+</sup> molecular ion with m/z 511.539 are presented in the right corner.

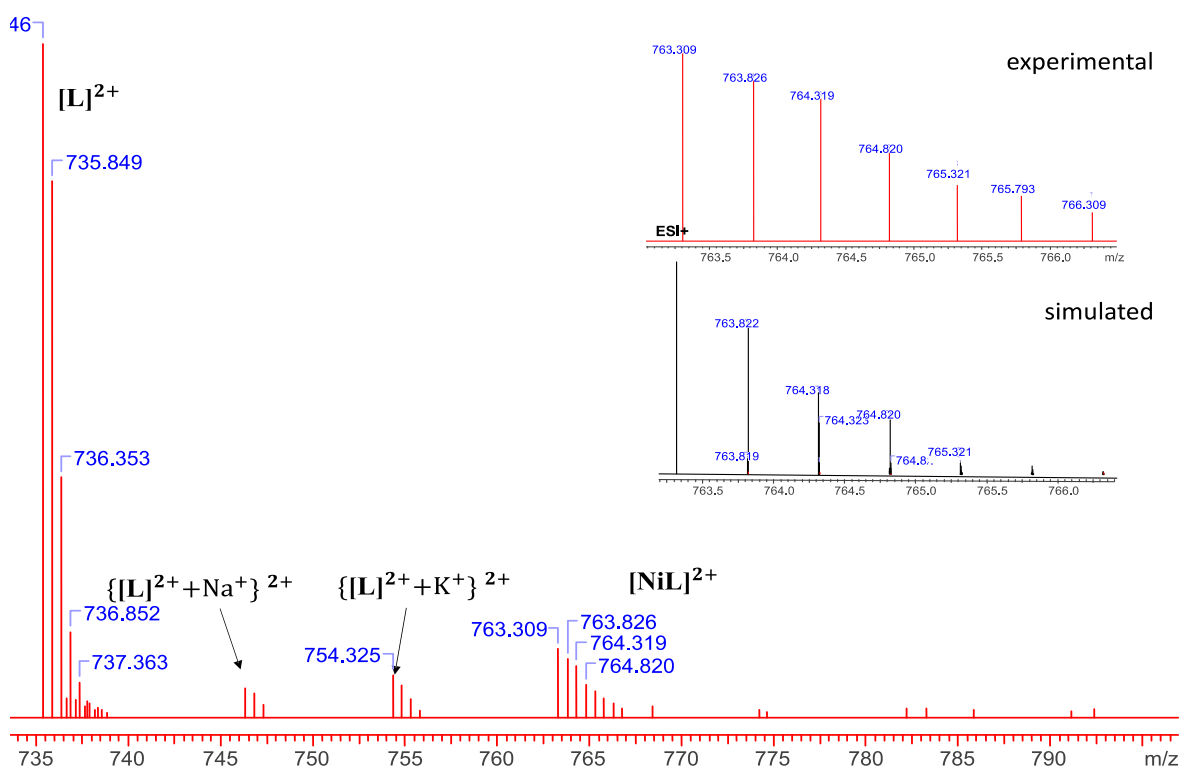

**Figure S5.** Mass spectrum for the Ni(II)-Ac-EHELGHAI GLDHT-NH<sub>2</sub> complex (metal to ligand molar ratio 1:1, [Ni(II)] = 2 mM). Experimental and simulated spectra for the [NiL]<sup>2+</sup> molecular ion with m/z 763.811 are presented in the right corner.

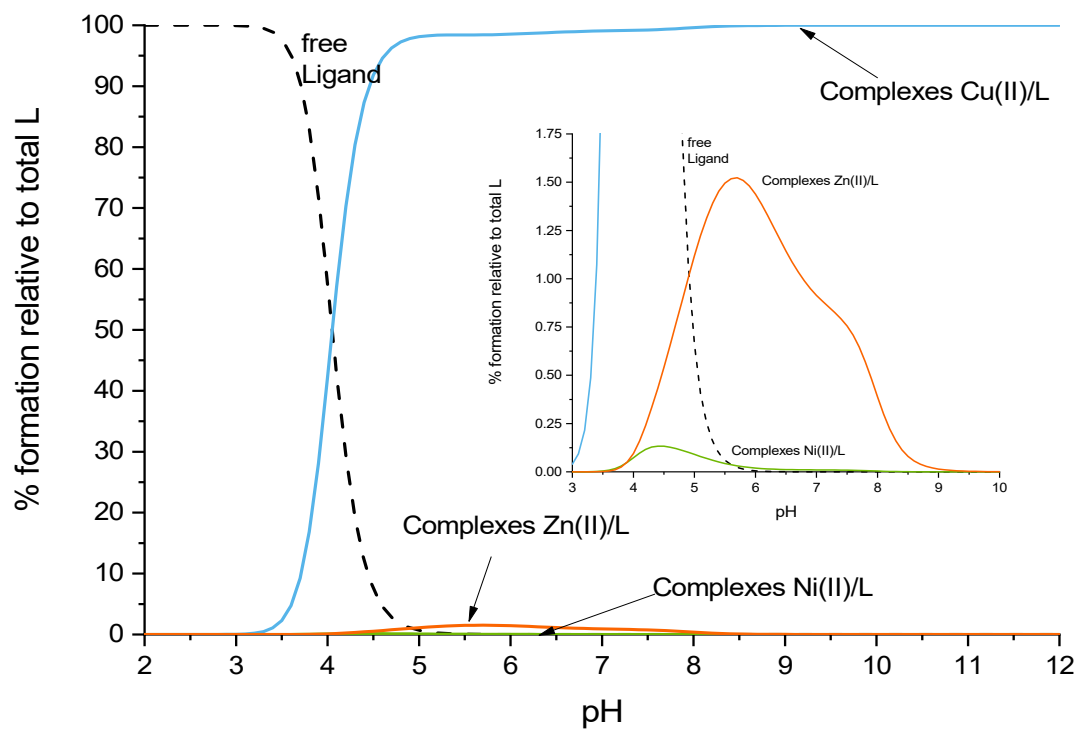

**Figure S6.** Competition plots showing the comparison of thermodynamic stability between complexes of Zn(II), Cu(II), and Ni(II) ions with ligand L – Ac-EHELGHAIGLDHT-NH<sub>2</sub> peptide. The molar ratio for ligand and metal ions L : Zn(II) : Cu(II) : Ni(II) are 224:21:1.
